# Supplementary material for: ZFHX3 is indispensable for ERβ to inhibit cell proliferation via MYC downregulation in prostate cancer cells
Source: PubMed Central journal article supplement (PMC6461672; doi:10.1038/s41389-019-0138-y), 2019-04-12
Supplement: 41389_2019_138_MOESM7_ESM.pdf [file 41389_2019_138_MOESM7_ESM.pdf]

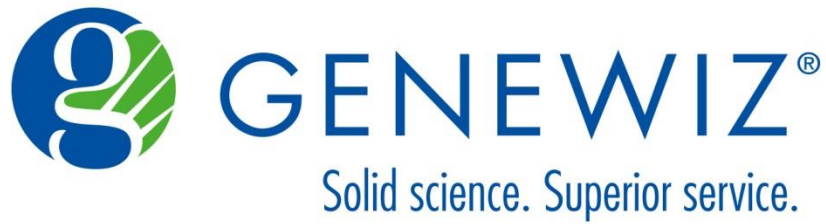

# Cell Line Authentication Report

**GENEWIZ, Inc. Suzhou**

C3 Building, 218 Xinghu Road,

Suzhou Industrial Park, 215123,

Suzhou, China

Fax: 010-59458058

Email: [Genomics.China@genewiz.com.cn](mailto:Genomics.China@genewiz.com.cn)

[www.genewiz.com.cn](http://www.genewiz.com.cn)

## Cell Line Authentication Report

Customer: HuQingXia

Institution: NanKai University

Quotation Number: 80-67123553

Completion Date: 07/10/2017

### 1. Sample ID: C4-2B

### 2. Original Material: Cell pellets

### 3. Methods:

1). Genomic DNA was extracted from the cell pellets provided by the customer.

2). Samples, together with positive and negative control were amplified using GenePrint 10 System (Promega).

3). Amplified products were processed using the ABI3730xl Genetic Analyzer.

4). Data were analyzed using GeneMapper4.0 software and then compared with the ATCC, DSMZ or JCRB databases for reference matching.

### 4. Results:

#### 1) 10 Loci STR Profile:

| Genetic Site | Customer sample |      |    |
|--------------|-----------------|------|----|
| (Locus)      | C4-2B           |      |    |
| Amelogenin   | X               |      |    |
| CSF1PO       | 9               | 10   | 11 |
| D13S317      | 10              | 11   |    |
| D16S539      | 11              |      |    |
| D5S818       | 11              | 12   |    |
| D7S820       | 9.1             | 10.3 |    |
| THO1         | 9               |      |    |
| TPOX         | 8               | 9    |    |
| vWA          | 16              | 18   |    |
| D21S11       | 29              | 32.2 |    |

<<<If the Percent match is not 100%, search for reference matching with the ATCC, DSMZ or JCRB databases and add the match results.

Addendum: Comparative output from the ATCC STR Profile database

**Result of STR matching analysis by your data.**  
- DSMZ Profile Database -

A graphical presentation is shown at the bottom of this page.

| EV           | Cell No. | Cell name                | Locus names   |               |                    |               |               |             |             |             |                  | Figures |
|--------------|----------|--------------------------|---------------|---------------|--------------------|---------------|---------------|-------------|-------------|-------------|------------------|---------|
|              |          |                          | D5S818        | D13S317       | D7S820             | D16S539       | VWA           | TH01        | AM          | TPOX        | CSF1PO           |         |
|              |          | <i>Query (Your Cell)</i> | <i>11, 12</i> | <i>10, 11</i> | <i>9, 1, 10, 3</i> | <i>11, 11</i> | <i>16, 18</i> | <i>9, 9</i> | <i>X, X</i> | <i>8, 9</i> | <i>9, 10, 11</i> |         |
| 0.86 (32/37) | 256      | LNCAP                    | 11, 12        | 10, 12        | 9, 1, 10, 3        | 11, 11        | 16, 18        | 9, 9        | X, Y        | 8, 9        | 10, 11           | -       |
| 0.86 (32/37) | CRL-1740 | LNCaP clone FGC          | 11, 12        | 10, 12        | 9, 1, 10, 3        | 11, 11        | 16, 18        | 9, 9        | X, Y        | 8, 9        | 10, 11           | -       |
| 0.74 (28/38) | RCB2144  | LNCap, FGC               | 11, 12        | 10, 12        | 9, 9               | 11, 11        | 16, 17, 18    | 9, 9        | X, Y        | 8, 9        | 10, 11           | -       |
| 0.65 (24/37) | 104      | M-07e                    | 11, 11        | 10, 11        | 11, 11             | 11, 11        | 16, 18        | 6, 8        | X, X        | 8, 8        | 9, 10            | -       |
| 0.65 (24/37) | CRL-3035 | CHLA-03-AA               | 11, 11        | 10, 11        | 9, 10              | 11, 12        | 16, 18        | 6, 9        | X, X        | 8, 9        | 10, 10           | -       |
| 0.65 (24/37) | RCB2141  | PK-45P                   | 10, 12        | 9, 11         | 11, 11             | 11, 12        | 16, 18        | 9, 9        | X, X        | 8, 11       | 9, 10            | -       |
| 0.65 (24/37) | RCB2266  | HE50                     | 11, 12        | 10, 12        | 8, 9               | 11, 11        | 17, 17        | 9, 9        | X, Y        | 8, 9        | 10, 11           | -       |
| 0.63 (26/41) | 140      | SUP-T1                   | 11, 12, 10    | 10, 11, 12    | 11, 11             | 9, 10, 11     | 16, 18, 19    | 9, 3, 9, 3  | X, X        | 8, 9        | 10, 11           | -       |
| 0.62 (26/42) | 759      | LS-174T                  | 11, 15, 14    | 10, 11, 9     | 10, 3, 11          | 11, 12, 13    | 15, 18, 16    | 6, 7        | X, X        | 8, 9        | 10, 14, 11       | -       |

>>>

2) Electrophoretogram

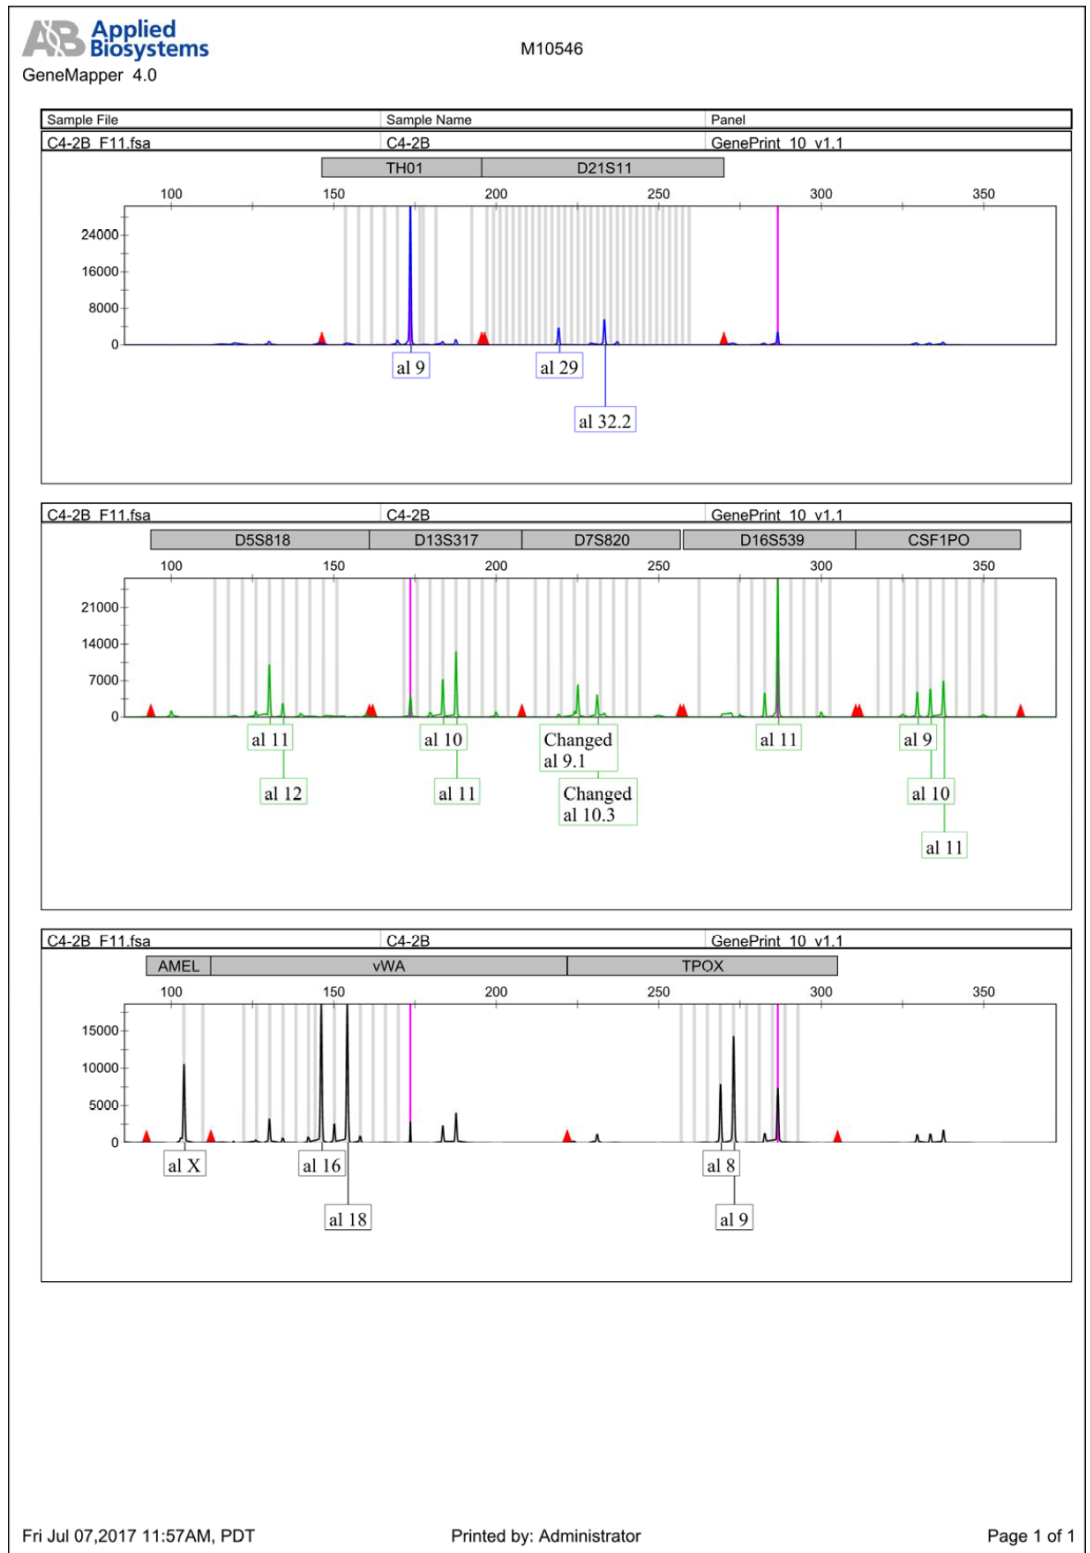

Note: Raw data in appendix
