# Supplementary material for: ZFHX3 is indispensable for ERβ to inhibit cell proliferation via MYC downregulation in prostate cancer cells
Source: PubMed Central journal article supplement (PMC6461672; doi:10.1038/s41389-019-0138-y), 2019-04-12
Supplement: 41389_2019_138_MOESM8_ESM.pdf [file 41389_2019_138_MOESM8_ESM.pdf]

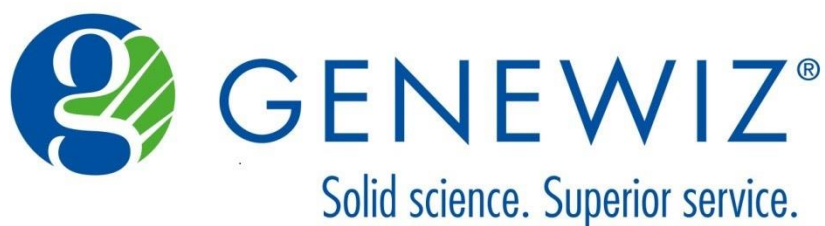

# Cell Line Authentication Report

**GENEWIZ, Inc.**

C3 Building, 218 Xinghu Road  
Suzhou Industrial Park, 215123

Suzhou, China

Tel: 400-8100-669

[www.genewiz.com](http://www.genewiz.com)

[www.genewiz.com.cn](http://www.genewiz.com.cn)

## Cell Line Authentication Report

Customer: Qingxia hu

Institution: Southern University of Science and Technology

Quotation Number: 80-269564405

Completion Date: 3/6/2019

### 1. Sample ID: Wt

### 2. Original Material: Cell pellets

### 3. Methods:

- 1). Genomic DNA was extracted from the cell pellets provided by the customer.
- 2). Samples, together with positive and negative control were amplified using GenePrint 10 System (Promega).
- 3). Amplified products were processed using the ABI3730xl Genetic Analyzer.
- 4). Data were analyzed using GeneMapper4.0 software and then compared with the ATCC, DSMZ, JCRB and

RIKEN etc. databases for reference matching.

### 4. Results:

#### 1) 10 Loci STR Profile:

| Genetic Site<br>(Locus) | Customer sample |         |
|-------------------------|-----------------|---------|
|                         | Wt              |         |
| Amelogenin              | X               | X       |
| CSF1PO                  | 9               | 10   11 |
| D13S317                 | 10              | 11      |
| D16S539                 | 11              | 11      |
| D5S818                  | 11              | 12      |
| D7S820                  | 9.1             | 10.3    |
| THO1                    | 9               | 9       |
| TPOX                    | 8               | 9       |
| vWA                     | 16              | 18      |
| D21S11                  | 29              | 32.2    |

<<< Search for reference matching with the Cell Bank databases and add the match results.

## Result of STR matching analysis by your data.

- DSMZ Profile Database -

A graphical presentation is shown at the bottom of this page.

| EV          | Cell No. | Cell name                | Locus names     |                 |                 |                 |                 |            |            |             |                 | Figures |
|-------------|----------|--------------------------|-----------------|-----------------|-----------------|-----------------|-----------------|------------|------------|-------------|-----------------|---------|
|             |          |                          | D5S818          | D13S317         | D7S820          | D16S539         | VWA             | TH01       | AM         | TPOX        | CSF1PO          |         |
|             |          | <i>Query (Your Cell)</i> | <b>11,12</b>    | <b>10,11</b>    | <b>9.1,10.3</b> | <b>11,11</b>    | <b>16,18</b>    | <b>9,9</b> | <b>X,X</b> | <b>8,9</b>  | <b>9,10,11</b>  |         |
| 0.86(32/37) | 256      | LNCAP                    | <b>11,12</b>    | <b>10,12</b>    | <b>9.1,10.3</b> | <b>11,11</b>    | <b>16,18</b>    | <b>9,9</b> | <b>X,Y</b> | <b>8,9</b>  | <b>10,11</b>    | -       |
| 0.86(32/37) | CRL-1740 | LNCaP clone FGC          | <b>11,12</b>    | <b>10,12</b>    | <b>9.1,10.3</b> | <b>11,11</b>    | <b>16,18</b>    | <b>9,9</b> | <b>X,Y</b> | <b>8,9</b>  | <b>10,11</b>    | -       |
| 0.74(28/38) | RCB2144  | LNCap.FGC                | <b>11,12</b>    | <b>10,12</b>    | 9,9             | <b>11,11</b>    | <b>16,17,18</b> | <b>9,9</b> | <b>X,Y</b> | <b>8,9</b>  | <b>10,11</b>    | -       |
| 0.65(24/37) | 104      | M-07e                    | <b>11,11</b>    | <b>10,11</b>    | 11,11           | <b>11,11</b>    | <b>16,18</b>    | 6,8        | <b>X,X</b> | <b>8,8</b>  | <b>9,10</b>     | -       |
| 0.65(24/37) | CRL-3035 | CHLA-03-AA               | <b>11,11</b>    | <b>10,11</b>    | 9,10            | <b>11,12</b>    | <b>16,18</b>    | 6,9        | <b>X,X</b> | <b>8,9</b>  | <b>10,10</b>    | -       |
| 0.65(24/37) | RCB2141  | PK-45P                   | <b>10,12</b>    | 9,11            | 11,11           | <b>11,12</b>    | <b>16,18</b>    | <b>9,9</b> | <b>X,X</b> | <b>8,11</b> | <b>9,10</b>     | -       |
| 0.65(24/37) | RCB2266  | HE50                     | <b>11,12</b>    | <b>10,12</b>    | 8,9             | <b>11,11</b>    | 17,17           | <b>9,9</b> | <b>X,Y</b> | <b>8,9</b>  | <b>10,11</b>    | -       |
| 0.63(26/41) | 140      | SUP-T1                   | <b>11,12,10</b> | <b>10,11,12</b> | 11,11           | 9,10, <b>11</b> | <b>16,18,19</b> | 9.3,9.3    | <b>X,X</b> | <b>8,9</b>  | <b>10,11</b>    | -       |
| 0.62(26/42) | 759      | LS-174T                  | <b>11,15,14</b> | <b>10,11,9</b>  | <b>10.3,11</b>  | <b>11,12,13</b> | <b>15,18,16</b> | 6,7        | <b>X,X</b> | <b>8,9</b>  | <b>10,14,11</b> | -       |

>>>

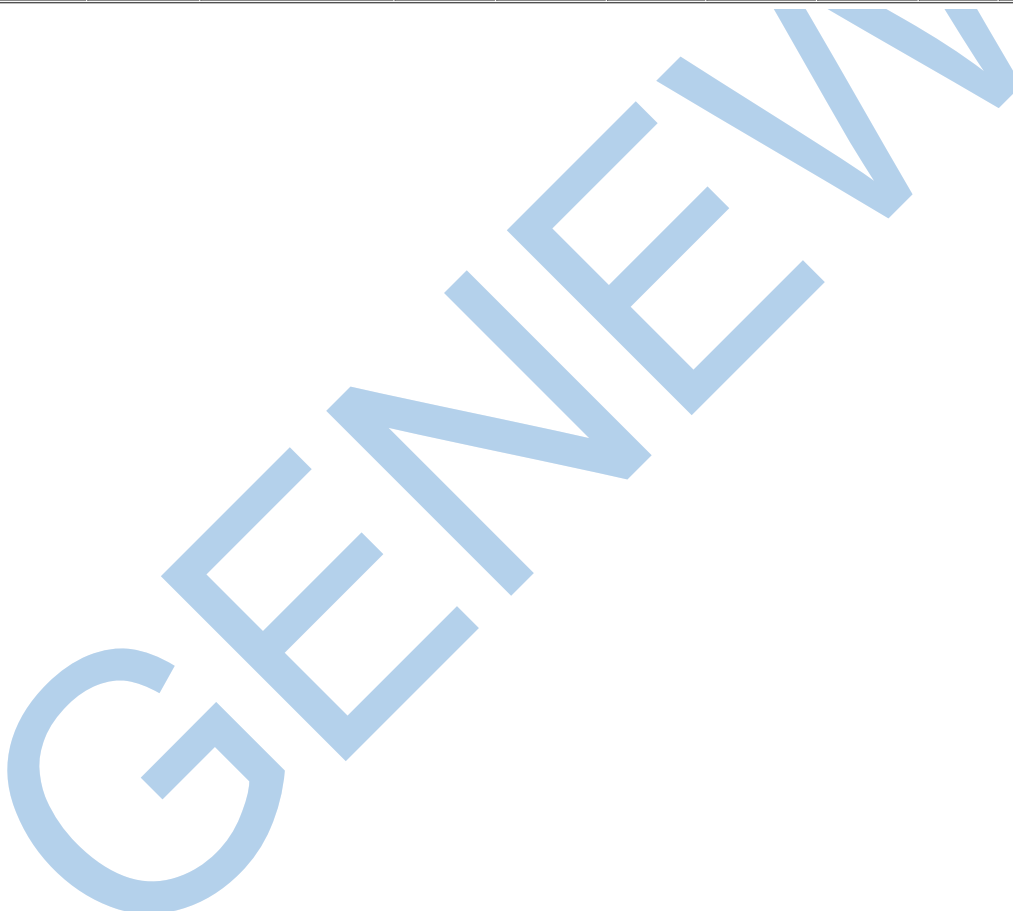

## 2) Electrophoretogram

**Applied Biosystems**  
GeneMapper 4.0

GENEWIZ\_2

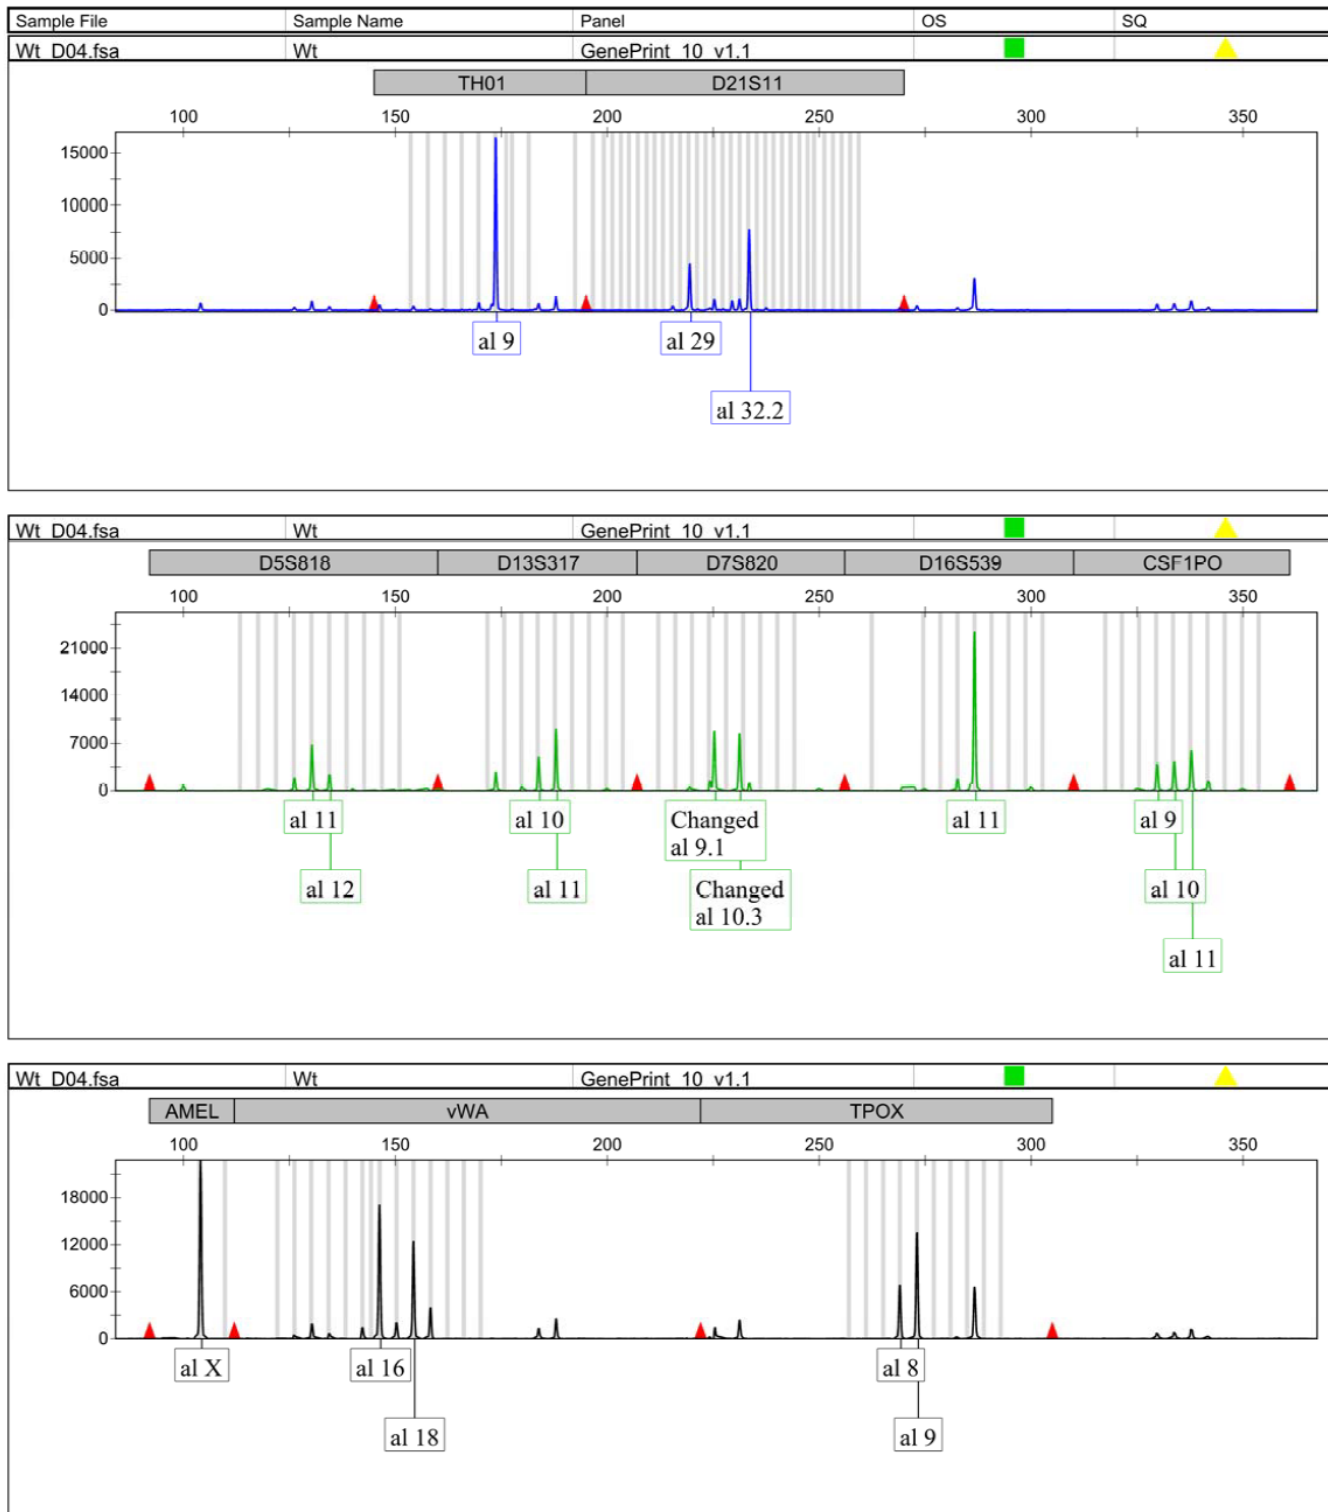

Note: Raw data in appendix
