# Supplementary material for: ZFHX3 is indispensable for ERβ to inhibit cell proliferation via MYC downregulation in prostate cancer cells
Source: PubMed Central journal article supplement (PMC6461672; doi:10.1038/s41389-019-0138-y), 2019-04-12
Supplement: 41389_2019_138_MOESM11_ESM.pdf [file 41389_2019_138_MOESM11_ESM.pdf]

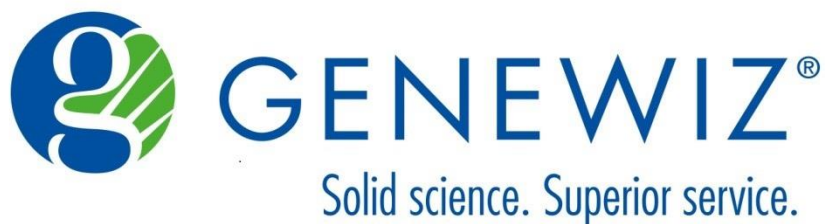

# Cell Line Authentication Report

GENEWIZ, Inc.

C3 Building, 218 Xinghu Road  
Suzhou Industrial Park, 215123

Suzhou, China

Tel: 400-8100-669

[www.genewiz.com](http://www.genewiz.com)

[www.genewiz.com.cn](http://www.genewiz.com.cn)

## Cell Line Authentication Report

Customer: Qingxia hu

Institution: Southern University of Science and Technology

Quotation Number: 80-269564405

Completion Date: 3/6/2019

### 1. Sample ID: LNCaP

### 2. Original Material: Cell pellets

### 3. Methods:

- 1). Genomic DNA was extracted from the cell pellets provided by the customer.
- 2). Samples, together with positive and negative control were amplified using GenePrint 10 System (Promega).
- 3). Amplified products were processed using the ABI3730xl Genetic Analyzer.
- 4). Data were analyzed using GeneMapper4.0 software and then compared with the ATCC, DSMZ, JCRB and

RIKEN etc. databases for reference matching.

### 4. Results:

#### 1) 10 Loci STR Profile:

| Genetic Site<br>(Locus) | Customer sample |      |
|-------------------------|-----------------|------|
|                         | LNCaP           |      |
| Amelogenin              | X               | Y    |
| CSF1PO                  | 10              | 11   |
| D13S317                 | 10              | 12   |
| D16S539                 | 11              | 11   |
| D5S818                  | 11              | 12   |
| D7S820                  | 9.1             | 10.3 |
| THO1                    | 9               | 9    |
| TPOX                    | 8               | 9    |
| vWA                     | 16              | 18   |
| D21S11                  | 29              | 32.2 |

<<< Search for reference matching with the Cell Bank databases and add the match results.

## Result of STR matching analysis by your data.

- DSMZ Profile Database -

A graphical presentation is shown at the bottom of this page.

| EV          | Cell No. | Cell name                | Locus names  |              |                 |              |              |            |            |            |              | Figures |
|-------------|----------|--------------------------|--------------|--------------|-----------------|--------------|--------------|------------|------------|------------|--------------|---------|
|             |          |                          | D5S818       | D13S317      | D7S820          | D16S539      | VWA          | TH01       | AM         | TPOX       | CSF1PO       |         |
|             |          | <i>Query (Your Cell)</i> | <i>11,12</i> | <i>10,12</i> | <i>9.1,10.3</i> | <i>11,11</i> | <i>16,18</i> | <i>9,9</i> | <i>X,Y</i> | <i>8,9</i> | <i>10,11</i> |         |
| 1.00(36/36) | 256      | LNCAP                    | 11,12        | 10,12        | 9.1,10.3        | 11,11        | 16,18        | 9,9        | X,Y        | 8,9        | 10,11        | -       |
| 1.00(36/36) | CRL-1740 | LNCaP clone FGC          | 11,12        | 10,12        | 9.1,10.3        | 11,11        | 16,18        | 9,9        | X,Y        | 8,9        | 10,11        | -       |
| 0.86(32/37) | RCB2144  | LNCap.FGC                | 11,12        | 10,12        | 9,9             | 11,11        | 16,17,18     | 9,9        | X,Y        | 8,9        | 10,11        | -       |
| 0.78(28/36) | RCB2266  | HE50                     | 11,12        | 10,12        | 8,9             | 11,11        | 17,17        | 9,9        | X,Y        | 8,9        | 10,11        | -       |
| 0.67(24/36) | CRL-2220 | CA-HPV-10                | 11,12        | 11,12        | 10,11           | 11,11        | 16,17        | 6,8        | X,Y        | 8,9        | 10,11        | -       |
| 0.67(24/36) | JCRB0041 | HLCL-1                   | 11,13        | 10,12        | 8,12            | 11,11        | 16,17        | 9,9        | X,Y        | 9,11       | 11,12        | -       |
| 0.61(22/36) | 237      | IGR-37                   | 11,12        | 12,12        | 10,11           | 11,11        | 17,21        | 9,9        | X,Y        | 8,11       | 11,12        | -       |
| 0.61(22/36) | 435      | HSB-2                    | 11,12        | 10,12        | 11,12           | 9,12         | 18,19        | 9,10       | X,Y        | 8,8        | 10,11        | -       |
| 0.61(22/36) | 676      | NGP                      | 11,12        | 8,12         | 11,11           | 8,11         | 16,21        | 9,9        | X,Y        | 6,9        | 11,12        | -       |
| 0.61(22/36) | 714      | KASUMI-3                 | 12,12        | 11,12        | 10,11           | 11,11        | 16,18        | 6,9        | X,Y        | 8,8        | 11,11        | -       |
| 0.61(22/36) | CRL-1110 | Sal Mat                  | 11,12        | 9,12         | 8,11            | 11,12        | 16,18        | 7,9        | X,Y        | 7,8        | 7,11         | -       |
| 0.61(22/36) | CRL-1834 | GK-5                     | 10,12        | 12,12        | 10,10           | 11,11        | 16,19        | 9,9,3      | X,Y        | 8,8        | 10,11        | -       |
| 0.61(22/36) | CRL-7062 | Hs 93.T                  | 10,11        | 11,12        | 11,13           | 11,11        | 14,16        | 7,9        | X,Y        | 8,9        | 10,12        | -       |

>>>

2) Electrophoretogram

**Applied Biosystems**  
GeneMapper 4.0

GENEWIZ\_2

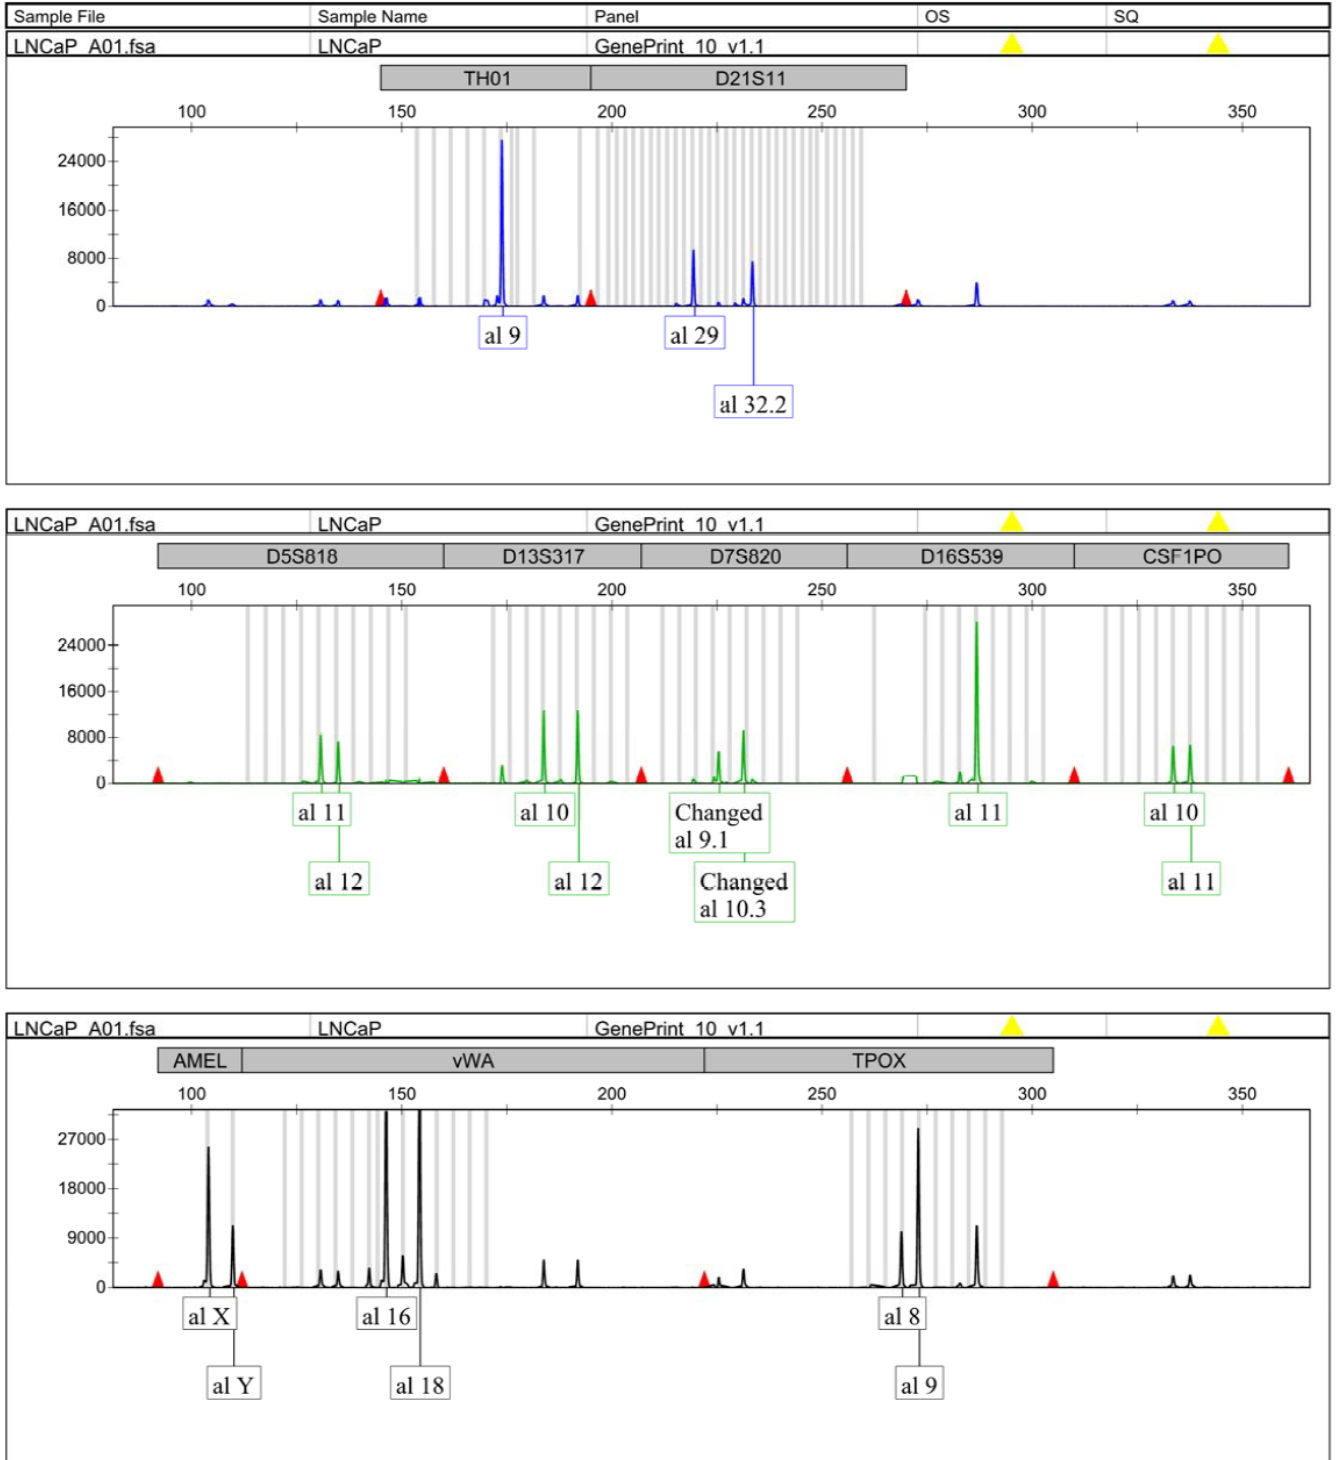

Note: Raw data in appendix
